# Supplementary material for: Structural phase stabilization via Ba site doping with bivalent Sr, Ca and Zn ions and Fe site doping with trivalent Cr and Ga ions in the BaFe12O19 hexaferrite and its magnetic modification
Source: Royal Society of Chemistry journal article supplement (doi:10.1039/d2ce00583b), 2022-01-01
Supplement: d2ce00583b3.pdf [file d2ce00583b3.pdf]

Table S1. The bond lengths and bond angles of hexaferrite phase obtained from Rietveld refinement (structural model) of the SXR patterns of samples sintered at 1000 °C.

| Sample<br>Dopant ionic radii ratio                 | Undoped     | Ba-site doping |             |             | Fe-site doping |             |
|----------------------------------------------------|-------------|----------------|-------------|-------------|----------------|-------------|
|                                                    | BM10        | BMSr10         | BMCa10      | BMZn10      | BMGa10         | BMCr10      |
| <b>Ba 2c site</b>                                  |             |                |             |             |                |             |
| Coordination Number (12)                           | 12.72       | 18.63          | 18.28       | 13.78       | 13.04          | 13.05       |
| $d_{\text{Ba}-\text{O}3} (\text{Å}) \times 6$      | 2.95214(6)  | 2.95093(3)     | 2.95581(6)  | 2.94808(3)  | 2.94712(5)     | 2.95019(8)  |
| $d_{\text{Ba}-\text{O}5} (\text{Å}) \times 6$      | 2.86792(5)  | 2.85900(3)     | 2.87600(4)  | 2.85455(3)  | 2.86100(3)     | 2.87300(4)  |
| Avg. $d_{\text{Ba}-\text{O}5} (\text{Å})$          | 2.91003(6)  | 2.90496(3)     | 2.91591(5)  | 2.90132(3)  | 2.90406(4)     | 2.91159(6)  |
| Distortion ( $10^{-4}$ )                           | 2.093       | 2.500          | 1.862       | 2.596       | 2.203          | 1.742       |
| $\angle \text{O}3 - \text{Ba} - \text{O}3$ (deg)   | 173.09(7)   | 173.09(7)      | 173.09(7)   | 173.09(7)   | 173.09(7)      | 173.09(7)   |
| $\angle \text{O}5 - \text{Ba} - \text{O}5$ (deg)   | 146.19(5)   | 146.10(2)      | 146.30(2)   | 146.08(3)   | 146.20(2)      | 146.30(2)   |
| $\angle \text{O}3 - \text{Ba} - \text{O}3$ (deg)   | 119.99(9)   | 119.99(9)      | 119.99(9)   | 119.99(9)   | 119.99(9)      | 119.99(9)   |
| $\angle \text{O}3 - \text{Ba} - \text{O}5$ (deg)   | 119.02(1)   | 119.11(9)      | 118.97(10)  | 119.13(6)   | 119.05(9)      | 118.94(11)  |
| $\angle \text{O}5 - \text{Ba} - \text{O}5$ (deg)   | 108.89(2)   | 108.70(2)      | 109.00(2)   | 108.62(3)   | 108.80(2)      | 109.10(2)   |
| $\angle \text{O}3 - \text{Ba} - \text{O}5$ (deg)   | 92.01(9)    | 92.01(9)       | 92.01(10)   | 92.02(6)    | 92.01(9)       | 92.00(11)   |
| $\angle \text{O}5 - \text{Ba} - \text{O}5$ (deg)   | 60.47(3)    | 60.65(9)       | 60.36(10)   | 60.69(4)    | 60.52(9)       | 60.30(11)   |
| $\angle \text{O}3 - \text{Ba} - \text{O}3$ (deg)   | 66.91(3)    | 66.91(3)       | 66.91(3)    | 66.91(3)    | 66.91(3)       | 66.91(3)    |
| $\angle \text{O}3 - \text{Ba} - \text{O}5$ (deg)   | 58.66(6)    | 58.56(9)       | 58.71(10)   | 58.54(12)   | 58.63(9)       | 58.74(11)   |
| $\angle \text{O}3 - \text{Ba} - \text{O}3$ (deg)   | 53.09(8)    | 53.09(8)       | 53.09(8)    | 53.09(8)    | 53.09(8)       | 53.09(8)    |
| <b>2a Octahedral site</b>                          |             |                |             |             |                |             |
| Coordination Number (6)                            | 6.31        | 9.09           | 9.38        | 7.51        | 6.20           | 6.56        |
| $d_{\text{Fe}1-\text{O}4} (\text{Å}) \times 6$     | 1.99454(1)  | 1.99500(20)    | 1.99100(20) | 1.97211(19) | 1.99290(20)    | 1.99100(2)  |
| Distortion ( $10^{-4}$ )                           | -0.002      | -0.001         | 0.00        | -0.001      | 0.001          | 0.000       |
| $\angle \text{O}4 - \text{Fe}1 - \text{O}4$ (deg)  | 180.00(0)   | 180.00(18)     | 180.00(19)  | 180.00(2)   | 180.00(18)     | 180.00(2)   |
| $\angle \text{O}4 - \text{Fe}1 - \text{O}4$ (deg)  | 86.99(6)    | 86.93(8)       | 87.08(9)    | 88.09(12)   | 86.92(8)       | 87.14(10)   |
| <b>2b Bipyramidal site</b>                         |             |                |             |             |                |             |
| Coordination Number (5)                            | 4.10        | 7.20           | 5.89        | 4.35        | 4.16           | 4.15        |
| $d_{\text{Fe}2-\text{O}1} (\text{Å}) \times 1$     | 2.50320(2)  | 2.44100(8)     | 2.48900(8)  | 2.52961(4)  | 2.50300(8)     | 2.52200(8)  |
| $d_{\text{Fe}2-\text{O}1} (\text{Å}) \times 1$     | 2.09919(1)  | 2.06500(8)     | 2.08600(8)  | 1.99457(3)  | 2.05300(8)     | 2.09900(8)  |
| $d_{\text{Fe}2-\text{O}3} (\text{Å}) \times 3$     | 1.89010(1)  | 1.88790(5)     | 1.88810(5)  | 1.89566(2)  | 1.88980(5)     | 1.88990(5)  |
| Avg. $d_{\text{Fe}-\text{O}} (\text{Å})$           | 2.05454(1)  | 2.04786(6)     | 2.05264(5)  | 2.042232(3) | 2.04508(6)     | 2.05814(6)  |
| Distortion ( $\times 10^{-4}$ )                    | 21.728      | 111.375        | 19.580      | 4.975       | 13.467         | 21.833      |
| $\angle \text{O}1 - \text{Fe}2 - \text{O}1$ (deg)  | 180.00(2)   | 180.00(6)      | 180.00(6)   | 179.97(4)   | 180.00(6)      | 180.00(6)   |
| $\angle \text{O}1 - \text{Fe}2 - \text{O}3$ (deg)  | 83.86(4)    | 84.30(3)       | 83.90(3)    | 81.89(17)   | 83.20(3)       | 83.60(3)    |
| <b>4f<sub>1</sub> Tetrahedral site</b>             |             |                |             |             |                |             |
| Coordination Number (4)                            | 4.25        | 6.17           | 6.26        | 5.06        | 4.27           | 4.45        |
| $d_{\text{Fe}3-\text{O}2} (\text{Å}) \times 1$     | 1.89487(1)  | 1.90300(5)     | 1.93300(7)  | 2.06041(4)  | 1.88500(5)     | 1.90600(7)  |
| $d_{\text{Fe}3-\text{O}4} (\text{Å}) \times 3$     | 1.90682(12) | 1.90870(12)    | 1.90140(12) | 1.88267(2)  | 1.90620(11)    | 1.90160(14) |
| Avg. $d_{\text{Fe}-\text{O}} (\text{Å})$           | 1.90383(12) | 1.90728(10)    | 1.90930(5)  | 1.92710(2)  | 1.90090(10)    | 1.90270(12) |
| Distortion ( $\times 10^{-4}$ )                    | 0.074       | 0.014          | 0.508       | 15.951      | 0.242          | 0.008       |
| $\angle \text{O}4 - \text{Fe}3 - \text{O}4$ (deg)  | 111.25(5)   | 111.02(5)      | 111.56(5)   | 113.20(16)  | 111.06(5)      | 111.60(6)   |
| $\angle \text{O}2 - \text{Fe}3 - \text{O}4$ (deg)  | 107.62(4)   | 107.90(3)      | 107.30(4)   | 105.42(2)   | 107.80(3)      | 107.20(4)   |
| <b>4f<sub>2</sub> Octahedral site</b>              |             |                |             |             |                |             |
| Coordination Number (6)                            | 6.36        | 9.31           | 9.14        | 6.89        | 6.52           | 6.53        |
| $d_{\text{Fe}4-\text{O}3} (\text{Å}) \times 3$     | 2.05854(11) | 2.06110(11)    | 2.04670(12) | 2.02815(2)  | 2.05860(11)    | 2.05680(14) |
| $d_{\text{Fe}4-\text{O}5} (\text{Å}) \times 3$     | 1.97743(11) | 1.97000(2)     | 1.98500(2)  | 1.98913(5)  | 1.97100(2)     | 1.98100(2)  |
| Avg. $d_{\text{Fe}-\text{O}} (\text{Å})$           | 2.01799(11) | 2.01555(18)    | 2.01585(12) | 2.00864(4)  | 2.01480(6)     | 2.01890(8)  |
| Distortion ( $10^{-4}$ )                           | 4.038       | 5.140          | 2.322       | 0.938       | 4.737          | 3.552       |
| $\angle \text{O}3 - \text{Fe}4 - \text{O}5$ (deg)  | 166.40(13)  | 165.93(15)     | 167.22(16)  | 168.02(2)   | 166.12(15)     | 166.66(17)  |
| $\angle \text{O}3 - \text{Fe}4 - \text{O}3$ (deg)  | 79.71(4)    | 79.56(4)       | 80.17(5)    | 81.02(12)   | 79.57(4)       | 79.73(6)    |
| <b>12k Octahedral site</b>                         |             |                |             |             |                |             |
| Coordination Number (6)                            | 6.36        | 9.19           | 9.22        | 7.12        | 6.44           | 6.63        |
| $d_{\text{Fe}5-\text{O}1} (\text{Å}) \times 1$     | 1.98580(11) | 2.00400(4)     | 1.98200(3)  | 1.99274(2)  | 1.99300(4)     | 1.97900(3)  |
| $d_{\text{Fe}5-\text{O}2} (\text{Å}) \times 1$     | 2.09619(11) | 2.08700(3)     | 2.07800(4)  | 2.02966(7)  | 2.09600(3)     | 2.09300(4)  |
| $d_{\text{Fe}5-\text{O}4} (\text{Å}) \times 2$     | 2.10937(9)  | 2.10800(2)     | 2.11100(2)  | 2.13659(4)  | 2.10600(2)     | 2.11100(3)  |
| $d_{\text{Fe}5-\text{O}5} (\text{Å}) \times 2$     | 1.928325(8) | 1.92700(2)     | 1.91600(2)  | 1.92316(4)  | 1.92800(2)     | 1.92200(2)  |
| Avg. $d_{\text{Fe}-\text{O}} (\text{Å})$           | 2.02623(9)  | 2.02683(3)     | 2.01900(3)  | 2.02365(4)  | 2.02617(3)     | 2.02300(4)  |
| Distortion ( $10^{-4}$ )                           | 16.055      | 15.074         | 17.467      | 19.019      | 15.483         | 17.369      |
| $\angle \text{O}1 - \text{Fe}5 - \text{O}2$ (deg)  | 173.16(13)  | 174.40(3)      | 173.70(3)   | 176.12(5)   | 173.60(3)      | 172.90(3)   |
| $\angle \text{O}1 - \text{Fe}5 - \text{O}4$ (deg)  | 85.74(8)    | 86.50(3)       | 85.80(3)    | 86.81(8)    | 85.10(3)       | 85.60(3)    |
| $\angle \text{Fe}2 - \text{O}1 - \text{Fe}5$ (deg) | 119.86(6)   | 120.80(3)      | 119.80(3)   | 120.34(7)   | 120.40(3)      | 119.60(3)   |
| $\angle \text{Fe}3 - \text{O}2 - \text{Fe}5$ (deg) | 126.70(4)   | 126.40(2)      | 126.10(3)   | 124.22(2)   | 126.81(20)     | 126.60(3)   |
| $\angle \text{Fe}5 - \text{O}2 - \text{Fe}5$ (deg) | 87.94(4)    | 88.39(11)      | 88.82(16)   | 91.46(3)    | 87.80(11)      | 88.06(16)   |
| $\angle \text{Fe}2 - \text{O}3 - \text{Fe}4$ (deg) | 143.86(8)   | 143.34 (12)    | 144.16(12)  | 146.71(2)   | 144.47(11)     | 144.16(13)  |
| $\angle \text{Fe}4 - \text{O}3 - \text{Fe}4$ (deg) | 84.53(2)    | 84.74(10)      | 83.93(11)   | 82.80(4)    | 84.73(10)      | 84.51(12)   |
| $\angle \text{Fe}1 - \text{O}4 - \text{Fe}3$ (deg) | 125.01(7)   | 124.72(7)      | 125.38(7)   | 127.96(9)   | 124.75(7)      | 125.50(8)   |
| $\angle \text{Fe}1 - \text{O}4 - \text{Fe}5$ (deg) | 95.87(3)    | 95.90(9)       | 95.93(9)    | 96.03(7)    | 95.91(9)       | 95.86(11)   |
| $\angle \text{Fe}4 - \text{O}5 - \text{Fe}5$ (deg) | 127.91(8)   | 127.81(10)     | 127.93(11)  | 128.09(5)   | 127.90(10)     | 127.92(12)  |
