# Supplementary figures and images for: Structural phase stabilization via Ba site doping with bivalent Sr, Ca and Zn ions and Fe site doping with trivalent Cr and Ga ions in the BaFe12O19 hexaferrite and its magnetic modification
Source: Royal Society of Chemistry journal article supplement (doi:10.1039/d2ce00583b), 2022-01-01

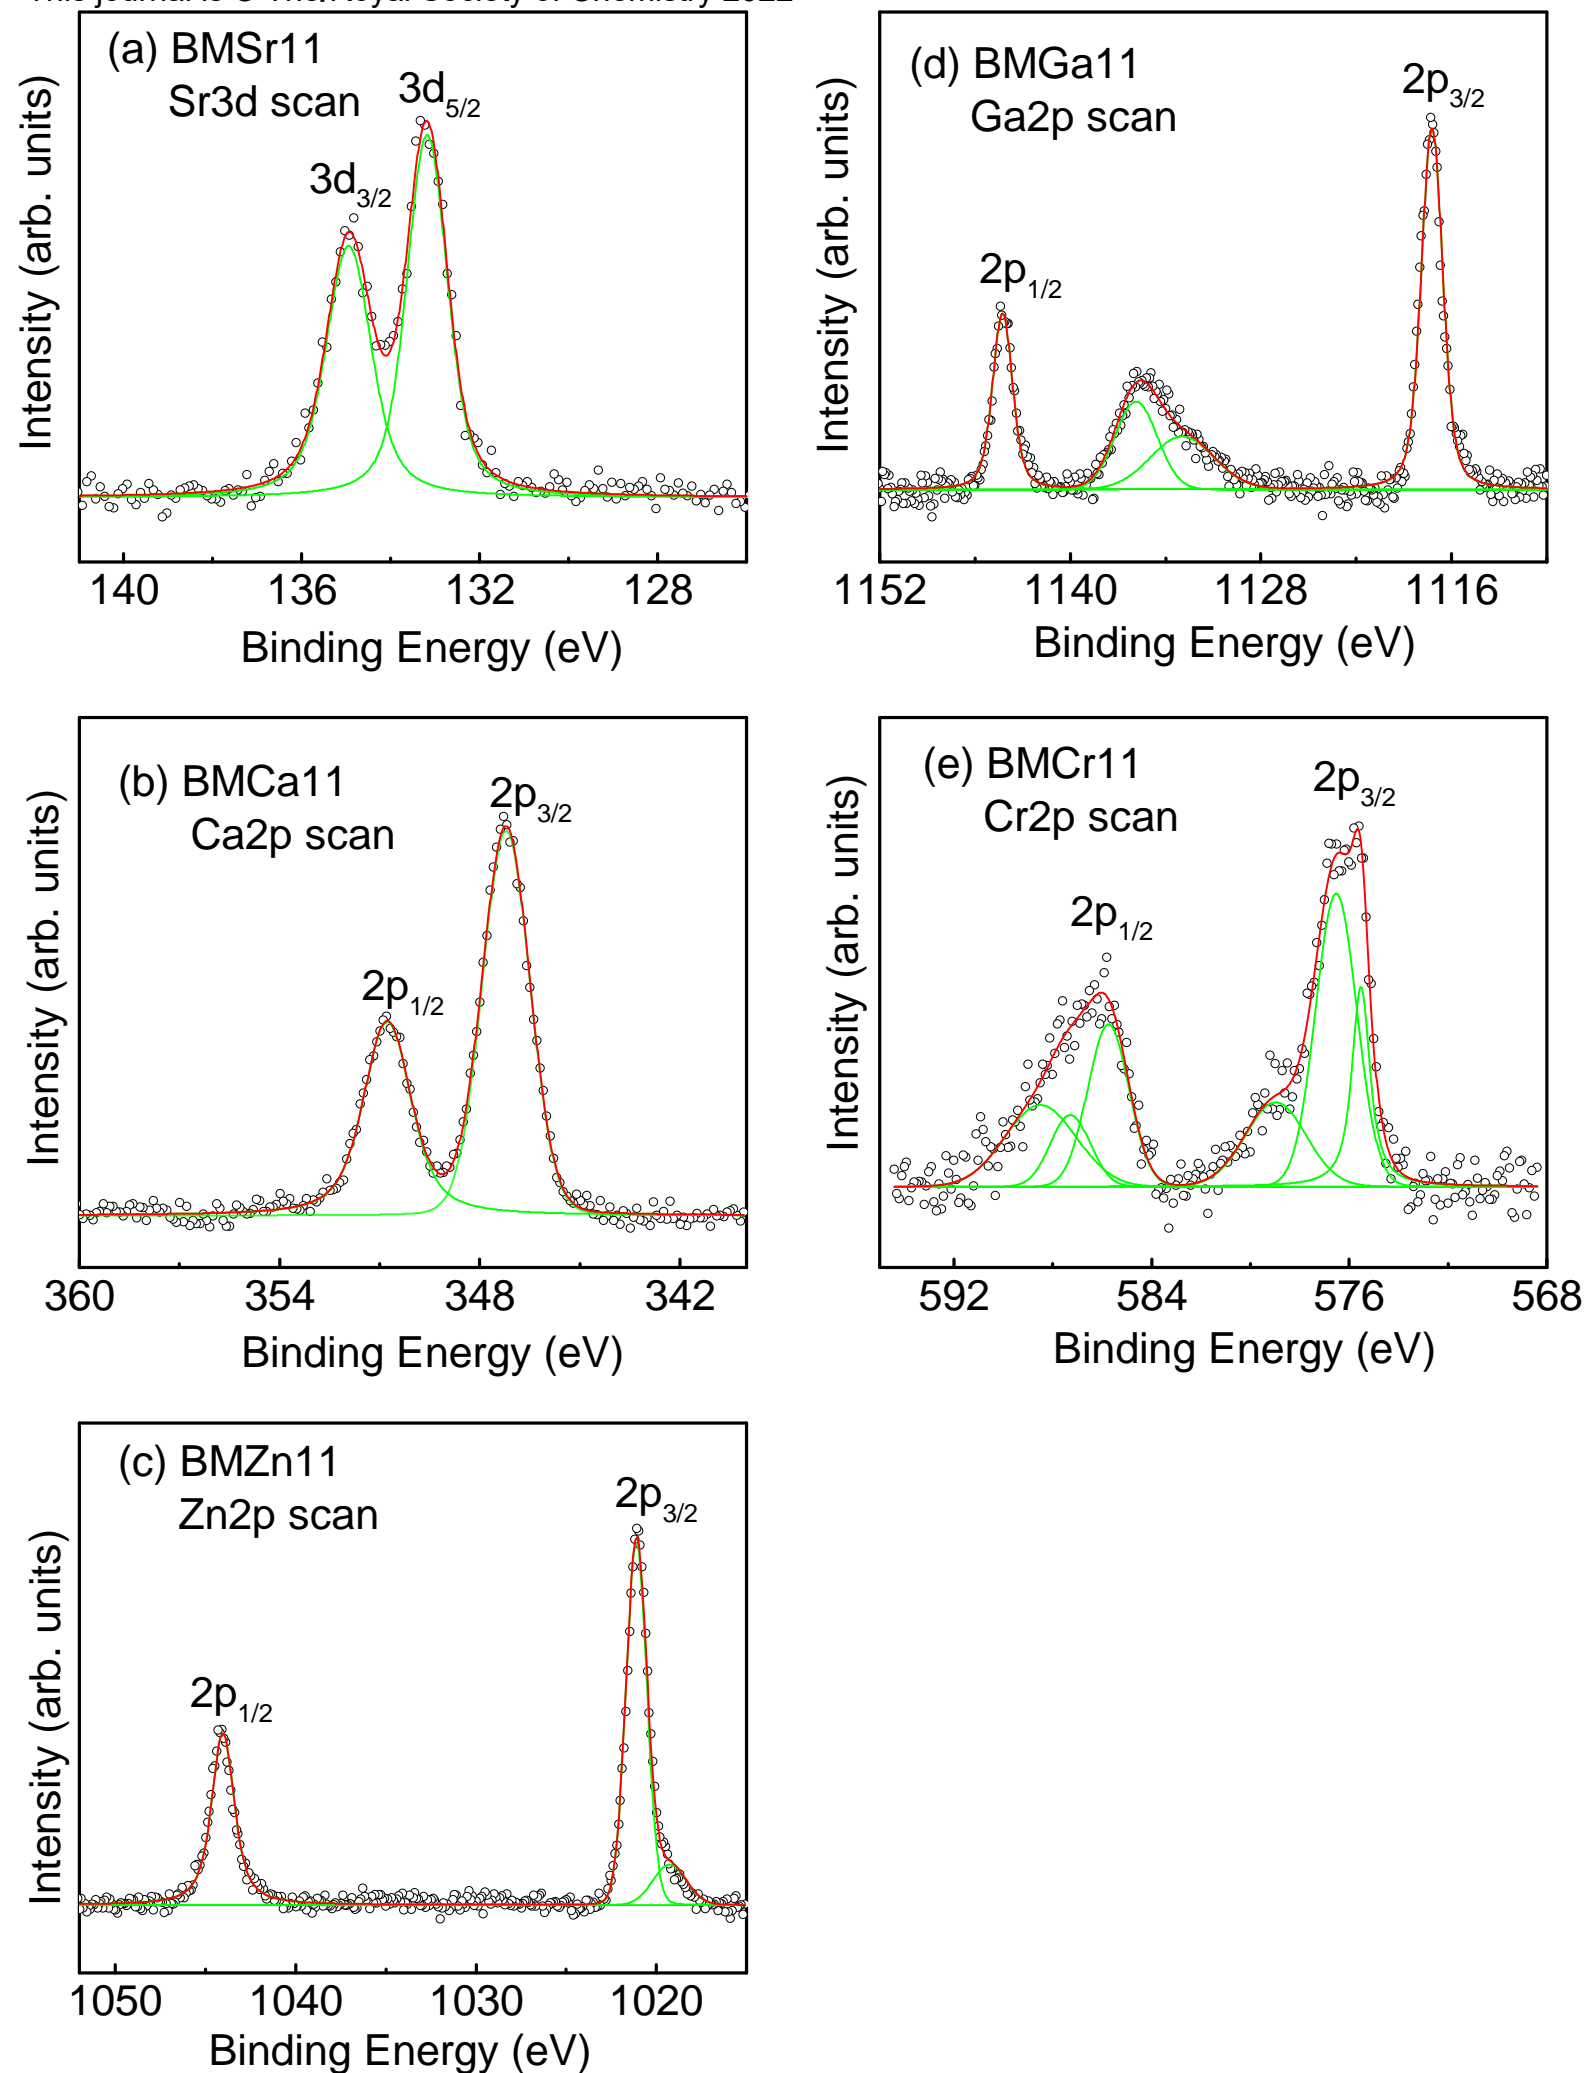

Fig. S2. XPS plots of dopants scan of Ba-site doping (a-c) and Fe-site doping (d-e) of samples heated at 1100 °C.

Supplement: d2ce00583b2.pdf [file d2ce00583b2.pdf]
